# Supplementary material for: Sex Specific Differences in Response to Calorie Restriction in Skeletal Muscle of Young Rats
Source: MDPI journal article supplement (doi:10.3390/nu14214535), 2022-10-28

# Supplementary Materials

**Supplemental Table S1.** Antibodies used for Western Blot.

| Target                       | Dilution | Source                   | Target | Dilution | Source                   |
|------------------------------|----------|--------------------------|--------|----------|--------------------------|
| Total OXPHOS Rodent Cocktail | 1:500    | Abcam (ab110413)         | SIRT3  | 1:1000   | Cell Signaling (cs2627)  |
| DRP1                         | 1:1000   | Santa Cruz (sc-32898)    | FOXO3A | 1:1000   | Cell Signaling (cs2497)  |
| FIS1                         | 1:500    | Santa Cruz (sc-98900)    | NRF2   | 1:1000   | Abcam (ab89443)          |
| SOD2                         | 1:500    | Santa Cruz (sc-30080)    | LC3A/B | 1:1000   | Cell Signaling (cs4108)  |
| Acetylated SOD2 (K68)        | 1:1000   | Abcam (ab137037)         | IRb    | 1:1000   | BD Biosciences (#610109) |
| ERRA                         | 1:1000   | Cell Signaling (cs13826) | IRS1   | 1:500    | Cell Signaling (cs3407)  |
| RIL1                         | 1:1000   | Abcam (AB40774)          | AKT    | 1:1000   | Cell Signaling (cs9272)  |
| IL6                          | 1:1000   | Santa Cruz (sc-57315)    | AMPK   | 1:1000   | Cell Signaling (cs2522)  |
| NFkB                         | 1:500    | Santa Cruz (sc-372)      | LKB1   | 1:1000   | Cell Signaling (cs13031) |
| IkB                          | 1:1000   | Cell signaling (cs4814)  | LDHA   | 1:1000   | Cell Signaling (cs2021)  |
| P53                          | 1:500    | Santa Cruz (sc-263)      | GSK3   | 1:500    | Santa Cruz (sc-9166)     |
| Caspase 3                    | 1:1000   | Cell Signaling (cs9662)  | IDH2   | 1:1000   | Cell Signaling (cs12652) |

**Supplemental Table S2.** Primers and conditions used for RT-qPCR.

| Gene            | Forward Primer (5'-3')<br>Reverse Primer (5'-3') | An.<br>T<br>(°C) | Gene          | Forward Primer (5'-3')<br>Reverse Primer (5'-3')  | An.<br>T<br>(°C) |
|-----------------|--------------------------------------------------|------------------|---------------|---------------------------------------------------|------------------|
| <i>Rpl32</i>    | CCAGTCGGACCGATATGTGAA<br>TCTGGCCCTTGAATCTTCTCC   | 60               | <i>Gsk3b</i>  | AAGGCACATCCTTGGACGAA<br>GTTGAAGAGGGCAGGTGTGT      | 58               |
| <i>Tbp</i>      | CACCGTGAATCTTGGCTGTAAAC<br>CGCAGTTGTTCGTGGCTCTC  | 60               | <i>Mtor</i>   | CTGATGTCATTTATTGGCAGAAA<br>CAGGGACTCAGAACACAAATGC | 57               |
| <i>Sod1</i>     | ACTTCGAGCAGAAGGCAAGC<br>CCAGGTCTCCAACATGCCTC     | 60               | <i>Hif1a</i>  | GCGGCGAGAACGAGAAGAA<br>AGATGGGAGCTCACGTTGTG       | 60               |
| <i>Sod2</i>     | ACCGAGGAGAAGTACCACGA<br>TAGGGCTCAGGTTTGTCCAG     | 60               | <i>Rela</i>   | GAACCTGTGGGGAAGGACTG<br>GGGGTTATTGTTGGTCTGGA      | 60               |
| <i>Sirt3</i>    | AGGCCCATATCCCTCTCTGT<br>ACTCCCTGGGGATCTGAAGT     | 60               | <i>Il1b</i>   | CTGTGACTCGTGGGATGATG<br>GGGATTTGTCTGTTGCTTGT      | 60               |
| <i>Nfe2l2</i>   | GCAACTCCAGAAGGAACAGG<br>AGGCATCTTGTTTGGGAATG     | 58               | <i>Tgfb1</i>  | GCAACAACGCAATCTATGAC<br>CCTGTATTCCGTCCTCTT        | 60               |
| <i>Foxo3</i>    | TTCGTTCTGAACCCGCATGA<br>CGGCTCACTTGTCCCAGAT      | 60               | <i>Tnf</i>    | CTGAACTTCGGGTGATCCG<br>CTTGGTGGTTTGCTACGACG       | 60               |
| <i>Map1lc3a</i> | GGTCCAGTTGTGCCTTTATTGA<br>GTGTGTGGGTTGTGTACGTCG  | 60               | <i>Cdkn1a</i> | GAGCAGTGCCCGAGTTAAGG<br>TGGAACAGGTCGGACATCAC      | 60               |
| <i>Sqstm1</i>   | CTAGGCATCGAGTTGACATT<br>CTTGGCTGAGTACCACTCTTATC  | 56               | <i>Cdkn2a</i> | TCCTCCGCTGGGAACGT<br>GGCGTGCTTGAGCAGAAGTT         | 55               |
| <i>Pik3ca</i>   | ACCTCAGGCTTGAAGAGTGTCG<br>CCGTAAGTCGTCGCCATTTTAA | 59               | <i>Tp53</i>   | TTCCTCAATAAGCTGTTCTGCC<br>TGCTCTCTTGCACCTCCCTGG   | 66               |
| <i>Akt1</i>     | CTAACTTGAGCCGCAGGAAC<br>GCTTGCTCAGTTTGCTACCC     | 57               | <i>Sirt6</i>  | GACCTAACGCTCGCTGATGA<br>CTGGCGGTCATGTTTGTG        | 60               |

An. T: annealing temperature; *Rpl32*: ribosomal protein L32; *Tbp*: TATA box binding protein; *Sod1*: superoxide dismutase 1; *Sod2*: superoxide dismutase 2; *sirt3*: sirtuin 3; *Nfe2l2*: nuclear factor erythroid 2-related factor 2; *Foxo3*: forkhead box O3; *Map1lc3a*: microtubule-associated protein 1 light chain 3 alpha; *Sqstm1*: sequestosome 1; *Pik3ca*: phosphatidylinositol-4,5-bisphosphate 3-kinase, catalytic subunit alpha; *Akt1*: AKT serine/threonine kinase 1; *Gsk3b*: glycogen synthase kinase 3 beta; *Mtor*: mechanistic target of rapamycin kinase; *Hif1a*: hypoxia inducible factor 1 subunit alpha; *Rela*: RELA proto-oncogene, nuclear factor kappa B subunit; *Il1b*: interleukin 1 beta; *Tgfb1*: transforming growth factor beta 1; *Tnf*: tumor necrosis factor; *Cdkn1a*: cyclin-dependent kinase inhibitor 1A; *Cdkn2a*: cyclin-dependent kinase inhibitor 2A; *Tp53*: tumor protein p53; *Sirt6*: sirtuin 6.

**Figure S1.** ATPase activity as a measure of muscle function. Effects of calorie restriction on the enzymatic activity of Complex V. Results are shown as the mean  $\pm$  SEM. Two-way ANOVA was performed to assess for significance. Abbreviations: S, sex differences,  $p=0.00215$ .

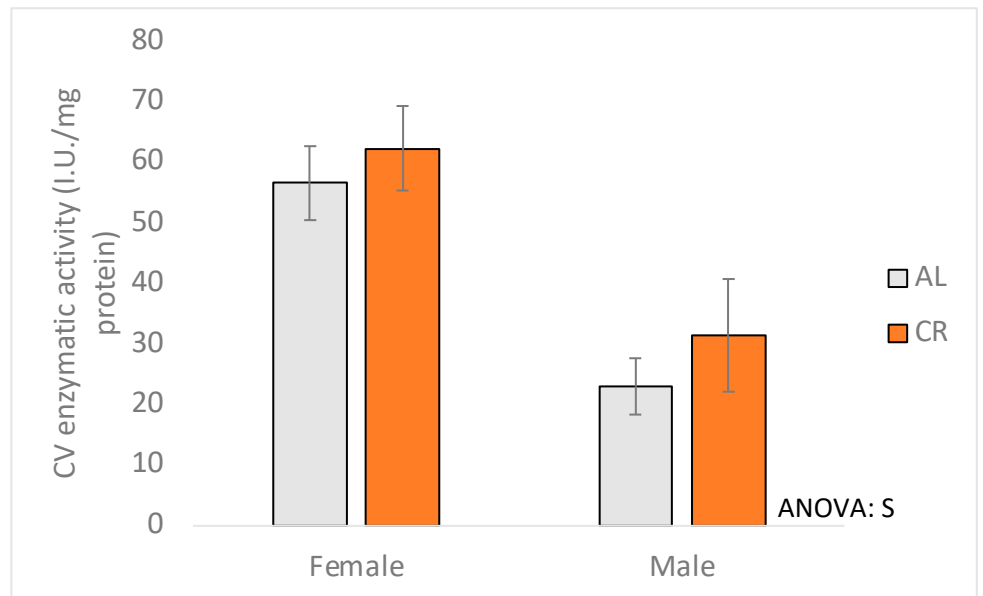

Supplement: s1 [file s1]
